# Supplementary material
Source: HighWire-hosted journal article supplement (doi:10.1101/rna.079991.124)
Supplement: Supplemental_Material.docx [file Supplemental_Material.docx]

Supplemental Material


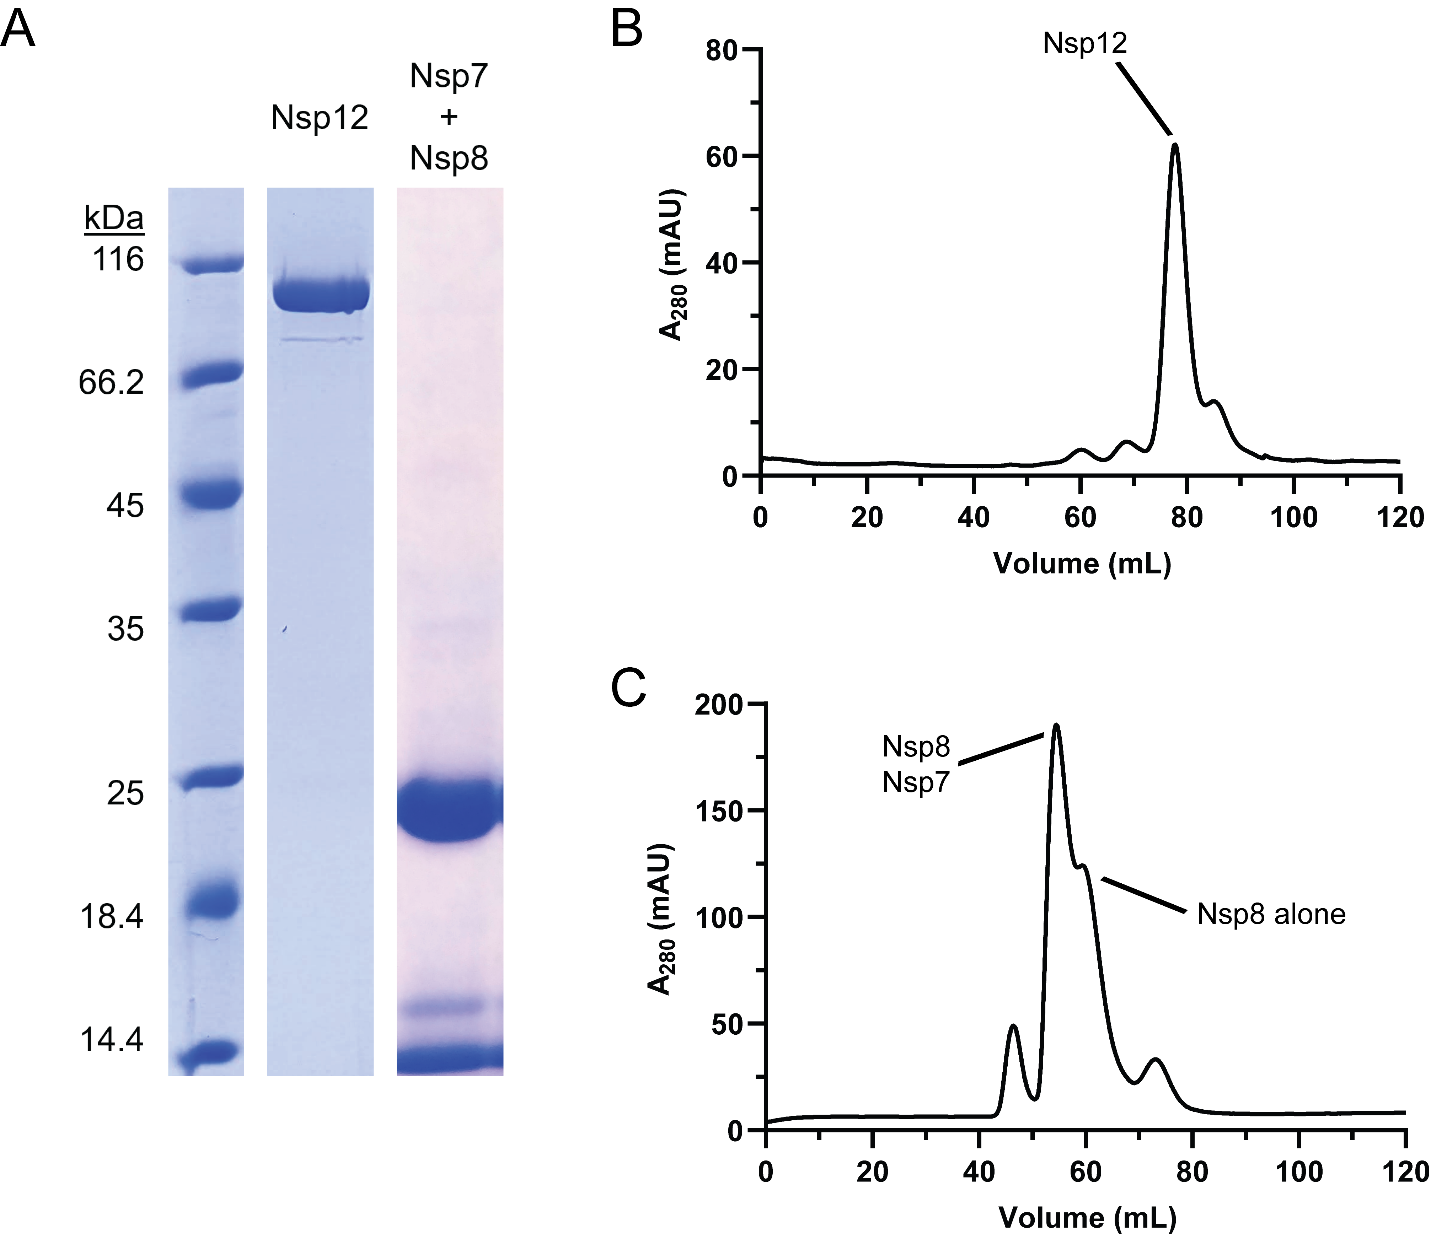


**Supplemental Figure 1.** Representative purification of recombinant proteins used in transcription assays. (A) SDS-PAGE of purified recombinant Nsp12, and copurified recombinant Nsp7 + Nsp8. (B) Superdex 200 size-exclusion chromatogram of Nsp12. (C) Superdex 75 size-exclusion chromatogram of Nsp7 and Nsp8. Excess Nsp8 was included in the final purification to facilitate the formation of the subcomplex with 1 copy of Nsp7 and 2 copies of Nsp8.


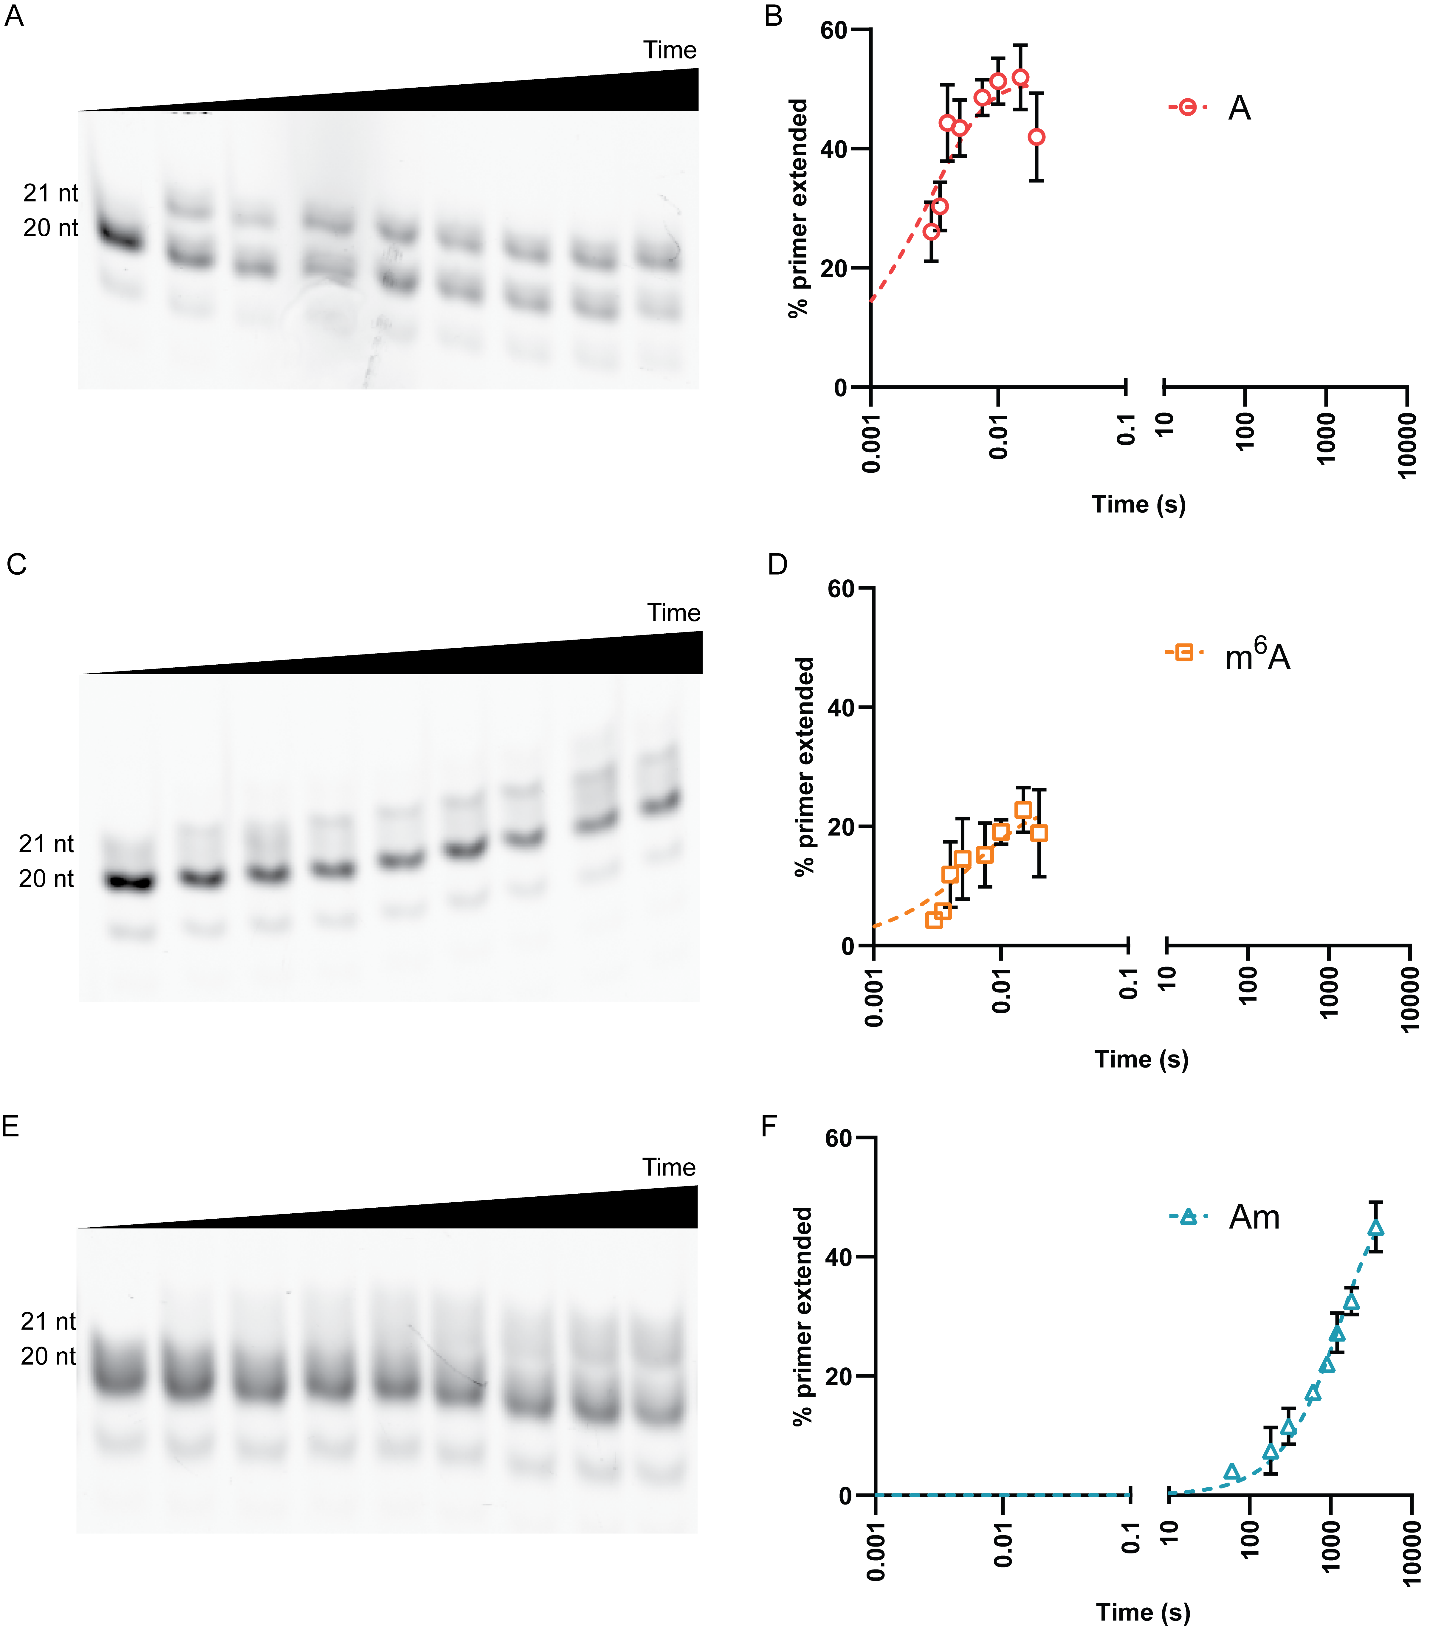


**Supplemental Figure 2.** Representative gels of transcription time courses for templates with adenosine (A), N6-methyladenosine (C), or 2’O-methyladenosine (E) in the +1 position, and corresponding plots and curve fits (B, D, F).


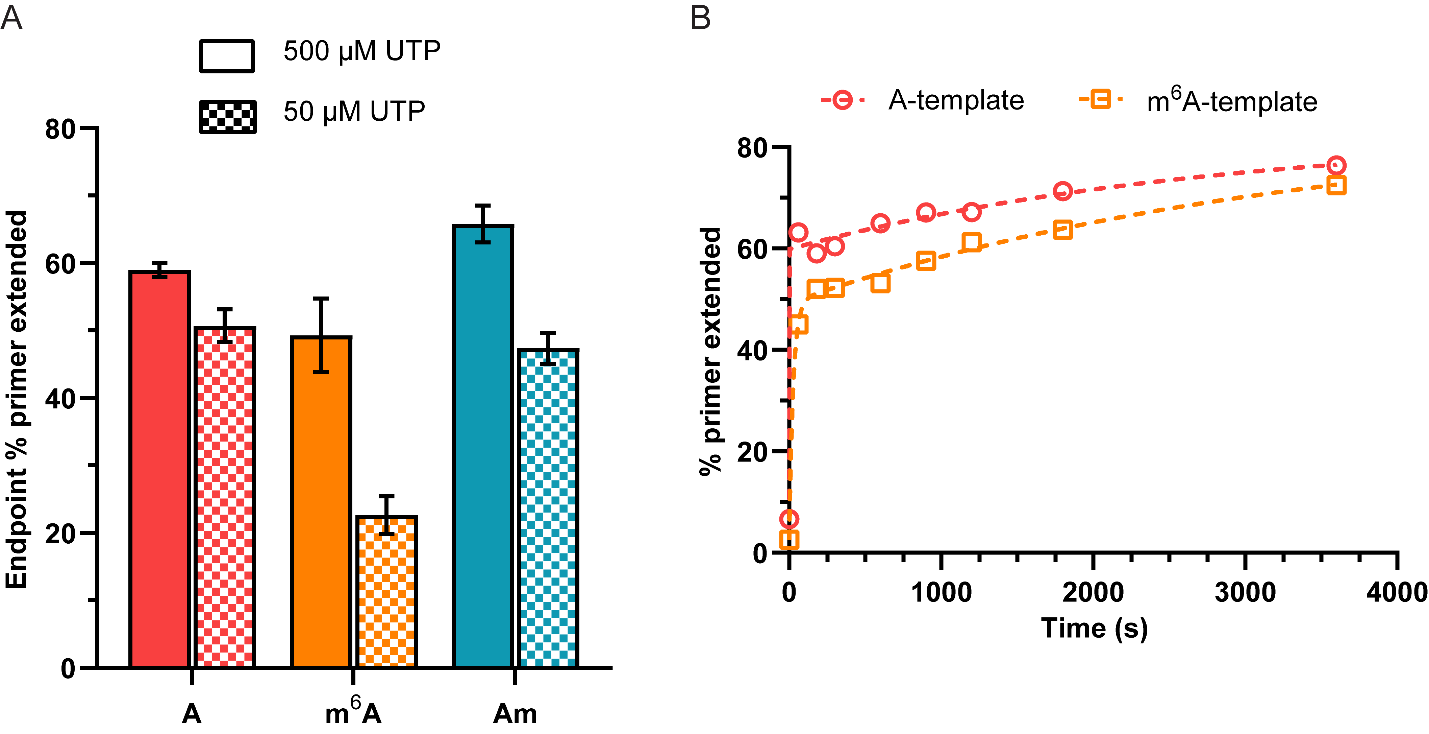


**Supplemental Figure 3.** Endpoints of transcription reactions at different time scales. (A) Endpoint % primer extension from transcription reactions using 500 or 50 µM UTP. A-template and m6A-template reactions are from rapid quench time courses, while Am-template reactions are from benchtop time courses. (B) One hour time courses for transcription with 500 μM UTP and RNA containing A or m6A in the +1 position, fit to a biphasic curve for a single replicate.


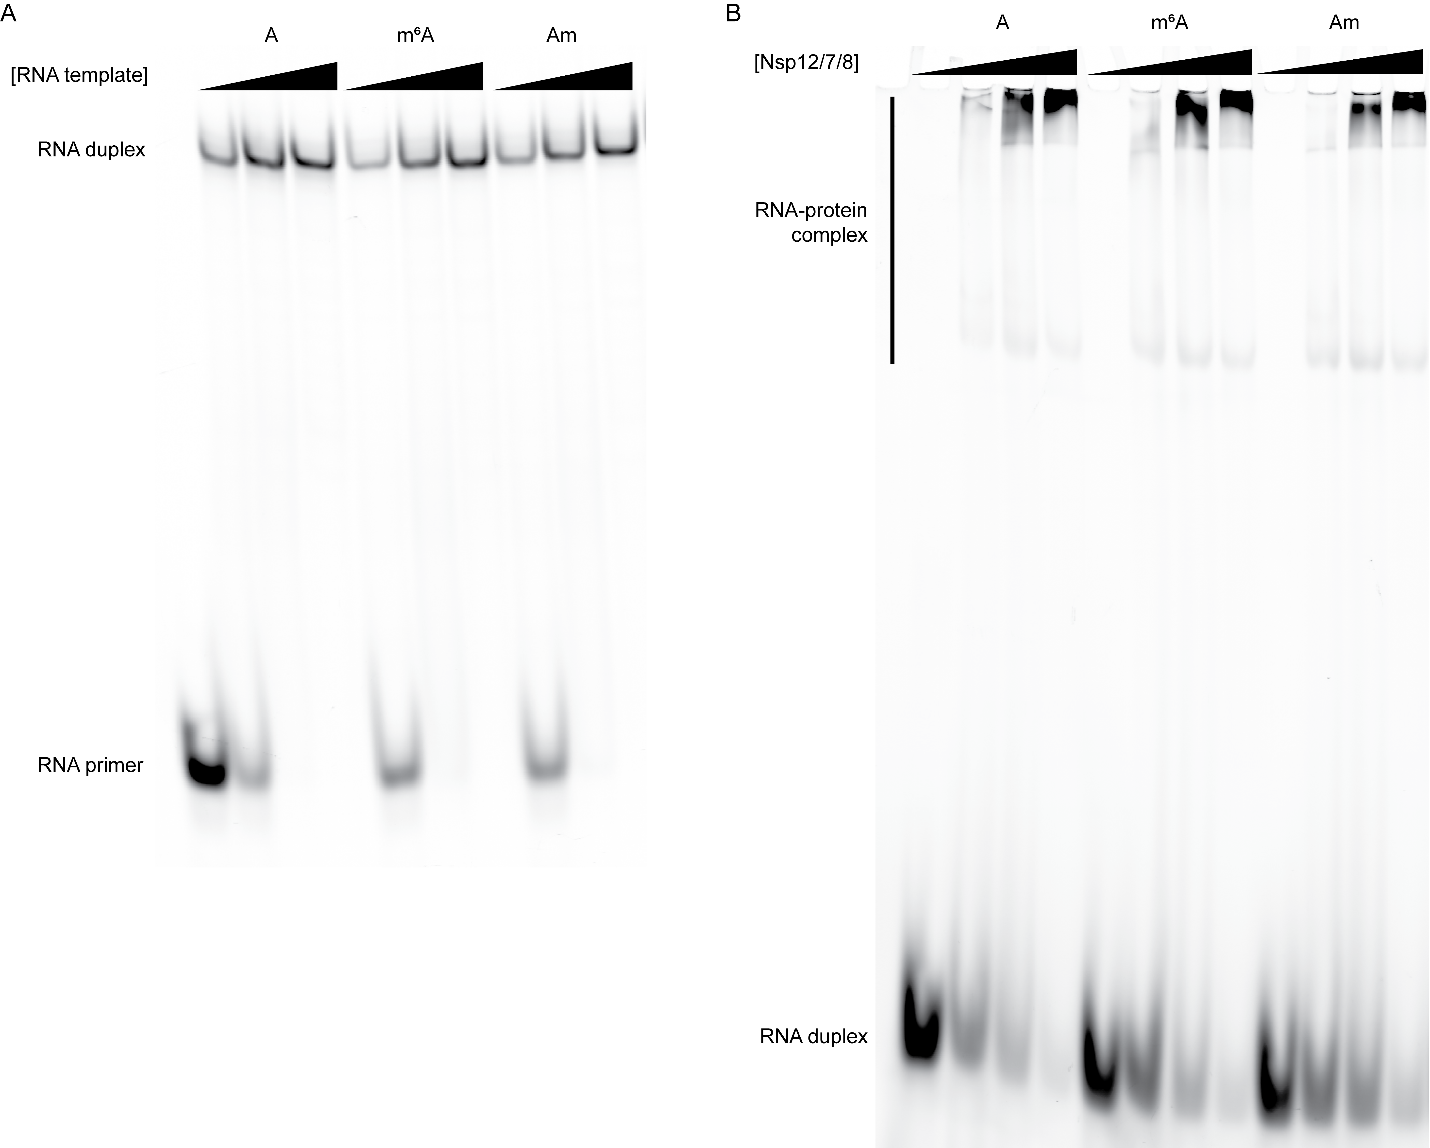


**Supplemental Figure 4.** Gel shift assays of complex formation. (A) Annealing of 20 nt fluorescent RNA primer to each 40 nt RNA template at increasing concentration, run on a 20% native PAGE, (B) Binding of annealed RNA duplex to preformed Nsp12/7/8 complex at increasing concentrations, run on a 10% native PAGE.

| **RNA name** | **Sequence (5’-3’)** |
| --- | --- |
| 20 nt primer | GUCAUUCUCCUAAGAAGCUA |
| 21 nt primer | GUCAUUCUCCUAAGAAGCUAU |
| 22 nt primer | GUCAUUCUCCUAAGAAGCUAUA |
| +1 A template | CUAUCCCCAUGUGAUUUUUAUAGCUUCUUAGGAGAAUGAC |
| +1 m6A template | CUAUCCCCAUGUGAUUUUU(m6A)UAGCUUCUUAGGAGAAUGAC |
| +1 Am template | CUAUCCCCAUGUGAUUUUU(Am)UAGCUUCUUAGGAGAAUGAC |
| +7 m6A template | CUAUCCCCAUGUG(m6A)UUUUUAUAGCUUCUUAGGAGAAUGAC |
| +7 Am template | CUAUCCCCAUGUG(Am)UUUUUAUAGCUUCUUAGGAGAAUGAC |

**Supplemental Table 1.** Table of RNA sequences used in this paper.
